# Supplementary material for: Front-line intraperitoneal versus intravenous chemotherapy in stage III-IV epithelial ovarian, tubal, and peritoneal cancer with minimal residual disease: a competing risk analysis
Source: BMC Cancer. 2016 Mar 17;16:235. doi: 10.1186/s12885-016-2279-0 (PMC4797353; doi:10.1186/s12885-016-2279-0)
Supplement: Additional file 1: — Dataset for computing competing risks. (CSV 18 kb) [file 12885_2016_2279_MOESM1_ESM.csv]

dfs	os	status	age_range	chemotherapy	histology	stage	grade	performance	residual
18	40.5	1	4	1	1	3	3	0	0
24	46.5	1	5	1	1	3	3	0	0
31	53.5	0	4	2	1	3	3	0	0
8	30.5	0	3	2	1	3	3	0	0
23	45.5	0	4	2	1	3	2	0	0
26	48.5	1	3	1	1	3	3	0	1
12	34.5	0	6	2	1	3	2	0	1
8	4	1	7	1	1	3	2	0	0
17	39.5	1	6	2	1	3	3	0	0
16	38.5	1	5	1	1	3	3	1	0
12	34.5	1	5	2	1	3	2	1	0
14	36.5	1	3	2	1	3	2	1	1
21	43.5	2	5	1	1	3	2	1	1
29	51.5	0	4	2	1	3	2	0	1
22	44.5	1	5	2	1	3	2	0	1
24	46.5	1	6	1	1	3	3	0	1
5	6	1	8	1	1	3	3	0	1
30	52.5	0	2	2	1	3	3	0	0
14	36.5	1	3	1	1	3	3	0	1
25	47.5	0	4	2	1	3	3	0	0
44	66.5	0	5	2	1	3	2	0	0
27	49.5	0	6	2	1	3	2	0	1
22	44.5	0	5	2	1	4	2	1	0
21	43.5	0	7	2	1	4	2	1	1
17	39.5	1	4	1	1	4	3	1	0
17	39.5	1	5	1	1	4	3	0	1
72	94.5	2	5	1	1	4	3	0	1
16	38.5	1	5	1	1	4	3	0	1
28	50.5	1	5	1	1	3	2	0	0
26	48.5	2	5	2	1	3	1	0	0
25	47.5	0	4	2	1	3	2	0	1
6	28.5	0	4	2	1	3	3	0	0
26	48.5	1	4	2	1	3	3	1	0
25	47.5	0	4	1	1	4	3	0	0
29	51.5	0	4	1	1	4	2	0	0
28	50.5	1	4	1	1	3	2	0	0
19	41.5	1	4	1	1	3	2	0	0
35	57.5	1	3	2	1	3	2	0	0
7	29.5	1	3	2	1	3	2	0	0
11	33.5	1	3	2	1	3	2	0	0
23	45.5	1	5	2	1	3	2	0	0
20	42.5	1	5	2	1	3	3	0	1
11	33.5	1	5	1	1	3	3	0	1
13	6	1	5	2	1	3	3	0	1
33	55.5	2	5	1	1	3	3	0	0
17	39.5	2	5	2	1	3	2	0	0
21	43.5	1	6	2	1	3	3	1	1
21	43.5	0	6	2	1	3	2	0	1
25	47.5	1	6	2	1	3	3	0	1
29	51.5	1	6	2	1	3	3	0	0
9	8	1	5	2	1	3	2	0	1
19	41.5	1	6	2	1	3	3	0	1
20	42.5	1	6	1	1	4	3	0	1
19	41.5	1	5	1	1	3	2	0	0
22	44.5	1	5	1	1	3	2	0	1
26	48.5	2	5	1	1	3	2	0	1
29	51.5	1	5	1	1	3	2	0	1
19	41.5	1	5	1	1	3	2	0	0
10	32.5	0	5	2	1	3	2	0	0
34	56.5	1	5	1	1	3	2	0	0
2	24.5	1	5	1	1	3	2	0	0
21	43.5	1	5	1	1	3	2	0	0
24	46.5	0	5	1	1	3	3	0	0
78	100.5	0	5	2	1	3	2	0	1
93	115.5	0	5	1	1	3	2	0	0
106	128.5	1	4	2	1	3	2	0	0
118	140.5	1	5	2	1	3	2	0	0
102	124.5	0	4	1	1	3	1	0	0
16	38.5	0	4	2	1	3	2	0	0
12	34.5	1	5	1	1	3	3	0	0
28	50.5	1	5	1	1	3	3	0	0
32	54.5	0	5	2	1	3	2	0	0
44	66.5	1	5	1	1	3	2	0	0
94	116.5	2	5	1	1	3	1	0	0
109	109	2	5	1	1	3	2	0	0
24	46.5	1	5	2	1	3	3	0	1
28	50.5	1	5	2	1	3	3	0	1
5	27.5	1	5	2	1	3	2	0	1
3	25.5	1	5	1	1	3	3	0	1
6	28.5	1	5	1	1	3	3	1	1
8	30.5	1	5	1	1	3	3	1	1
10	32.5	1	6	1	1	3	3	1	1
13	35.5	1	6	1	1	3	3	1	0
10	32.5	0	6	2	1	3	3	1	1
12	34.5	0	6	2	1	3	3	1	1
15	37.5	0	6	2	1	3	2	1	1
17	11	1	7	2	1	3	3	0	1
13	35.5	1	7	1	1	3	3	1	0
18	40.5	1	7	2	1	3	3	1	0
13	35.5	0	7	2	1	3	3	1	0
80	102.5	1	7	1	1	3	2	0	0
119	141.5	0	7	2	1	3	2	0	0
114	114	1	8	1	1	3	2	0	0
27	49.5	0	8	2	1	3	2	0	1
44	66.5	1	5	1	1	3	2	0	0
23	45.5	2	4	2	1	4	3	0	1
107	129.5	2	3	1	1	3	2	0	1
111	111	0	3	2	1	3	2	1	0
115	117	0	5	2	1	3	1	0	0
109	131.5	1	5	1	1	3	2	0	0
118	118	2	5	1	1	3	3	0	0
30	52.5	2	5	2	1	3	2	0	1
35	57.5	2	5	1	1	3	2	0	0
43	65.5	2	5	2	1	3	3	0	0
97	119.5	0	5	1	1	3	2	1	1
12	34.5	2	5	2	1	3	2	0	0
29	51.5	1	5	2	1	3	2	0	1
25	47.5	1	5	1	1	3	2	1	1
13	14	1	5	1	1	3	1	1	1
15	37.5	0	5	2	1	3	2	1	1
19	41.5	1	5	1	1	3	2	0	1
24	46.5	2	5	2	1	3	3	0	0
22	44.5	2	5	2	1	4	2	0	1
29	51.5	0	5	2	1	3	1	0	0
30	52.5	0	5	2	1	3	1	0	1
50	90	0	5	2	1	3	1	0	0
93	115.5	0	5	2	1	3	1	0	0
45	67.5	0	6	1	1	3	1	0	0
95	117.5	1	6	1	1	3	1	0	0
99	121.5	0	6	2	1	3	1	0	0
106	128.5	0	6	2	1	3	1	0	0
11	33.5	0	6	2	1	3	2	0	0
14	14	1	6	2	1	3	2	0	0
13	35.5	0	6	2	1	3	2	0	1
19	41.5	1	6	1	1	3	3	0	1
22	44.5	1	5	1	1	3	3	0	1
24	46.5	1	7	1	1	3	3	1	1
21	43.5	2	7	2	1	3	2	0	1
114	114	2	7	1	1	3	1	0	0
20	42.5	2	8	1	1	3	1	0	0
6	28.5	2	8	1	1	3	1	1	1
28	50.5	1	6	2	1	3	1	1	1
26	48.5	1	6	1	1	3	1	0	1
25	47.5	1	5	1	1	3	1	1	0
28	50.5	1	5	2	1	3	2	1	0
19	41.5	1	5	2	1	3	1	0	1
18	40.5	0	4	1	1	3	3	0	0
24	46.5	1	5	1	1	3	3	0	0
31	53.5	0	4	2	1	3	3	0	0
8	30.5	0	3	2	1	3	3	0	0
23	45.5	1	4	2	1	3	2	0	0
26	48.5	1	3	1	1	3	3	0	1
12	34.5	0	6	2	1	3	2	0	1
8	30.5	1	7	1	1	3	2	0	0
17	39.5	1	6	2	1	3	3	0	0
16	38.5	1	5	1	1	3	3	1	0
12	34.5	0	5	2	1	3	2	1	0
14	36.5	0	3	2	1	3	2	1	1
21	43.5	2	5	1	1	3	2	1	1
25	47.5	1	5	1	1	3	2	0	1
29	51.5	2	4	2	1	3	2	0	1
22	44.5	0	55	2	1	3	2	0	1
25	47.5	1	6	1	1	3	3	0	1
6	28.5	2	8	1	1	3	3	0	1
30	52.5	0	2	2	1	3	3	0	0
25	47.5	0	4	2	1	3	3	0	0
44	66.5	0	6	2	1	3	2	0	0
27	49.5	0	6	2	1	3	2	0	1
23	45.5	0	5	2	1	4	2	1	0
21	43.5	0	7	2	1	4	2	1	1
17	39.5	1	4	1	1	4	3	1	0
25	34	1	5	1	1	4	2	0	1
30	52.5	1	5	1	1	4	3	0	1
32	54.5	2	5	1	1	4	3	0	1
23	45.5	1	5	1	1	3	2	0	0
18	40.5	1	5	1	1	4	2	1	1
26	48.5	2	5	2	1	3	1	0	0
25	47.5	1	4	2	1	3	2	0	1
6	28.5	0	4	2	1	3	3	0	0
26	48.5	0	4	2	1	3	3	1	0
25	47.5	0	4	1	1	4	3	0	0
29	51.5	0	4	1	1	4	2	0	0
18	40.5	1	4	1	1	3	2	0	0
26	48.5	1	3	1	1	3	2	0	1
34	56.5	1	3	2	1	3	2	0	0
7	29.5	0	3	2	1	3	2	0	0
11	33.5	0	3	2	1	3	2	0	0
23	45.5	0	5	2	1	3	2	0	0
20	42.5	1	5	2	1	3	3	0	1
11	33.5	1	5	1	1	3	3	0	1
13	35.5	0	5	2	1	3	3	0	1
17	39.5	0	5	2	1	3	2	0	0
21	43.5	1	6	2	1	3	3	1	1
21	43.5	0	6	2	1	3	2	0	1
25	47.5	1	6	2	1	3	3	0	1
29	51.5	0	6	2	1	3	3	0	0
9	31.5	0	5	2	1	3	2	0	1
19	41.5	1	6	2	1	3	3	0	1
20	42.5	1	7	1	1	4	3	0	1
17	39.5	1	7	1	1	3	3	0	1
19	41.5	1	5	1	1	3	2	0	0
26	48.5	2	5	1	1	3	2	0	1
28	50.5	2	5	1	1	3	2	0	1
29	51.5	1	5	1	1	3	2	0	1
19	41.5	2	5	1	1	3	2	0	0
10	32.5	0	5	2	1	3	2	0	0
2	24.5	1	5	1	1	3	2	0	0
21	43.5	1	5	1	1	3	2	0	0
24	46.5	0	5	1	1	3	3	0	0
44	66.5	0	5	2	1	3	2	0	1
93	115.5	0	5	1	1	3	2	0	0
106	118	0	4	2	1	3	2	0	0
118	119	0	5	2	1	3	2	0	0
102	105	0	4	1	1	3	1	0	0
16	38.5	1	4	2	1	3	2	0	0
12	34.5	1	5	1	1	3	3	0	0
28	50.5	1	5	1	1	3	3	0	0
32	54.5	1	5	2	1	3	2	0	0
44	66.5	1	5	1	1	3	2	0	0
94	116.5	2	5	1	1	3	1	0	0
109	95	1	5	1	1	3	2	0	0
21	43.5	1	5	1	1	3	3	0	1
24	46.5	1	5	2	1	3	3	0	1
28	50.5	1	5	2	1	3	3	0	1
5	27.5	0	5	2	1	3	2	0	1
3	25.5	1	5	1	1	3	3	0	1
6	28.5	1	5	1	1	3	3	1	1
10	32.5	1	6	1	1	3	3	1	1
13	35.5	1	6	1	1	3	3	1	0
10	32.5	0	6	2	1	3	3	1	1
12	34.5	0	6	2	1	3	3	1	1
15	37.5	0	6	2	1	3	2	1	1
17	39.5	1	7	2	1	3	3	0	1
24	46.5	0	7	1	1	3	2	0	0
13	35.5	1	7	1	1	3	3	1	0
18	40.5	0	7	2	1	3	3	1	0
13	35.5	0	7	2	1	3	3	1	0
81	103.5	1	7	1	1	3	2	0	0
119	100	1	7	2	1	3	2	0	0
114	111	0	8	1	1	3	2	0	0
27	49.5	0	8	2	1	3	2	0	1
44	66.5	1	5	1	1	3	2	0	0
23	45.5	0	4	2	1	4	3	0	1
107	109	2	3	1	1	3	2	0	1
111	111	0	3	2	1	3	2	1	0
115	115	0	5	2	1	3	1	0	0
109	109	0	5	1	1	3	2	0	0
118	118	0	5	1	1	3	3	0	0
30	52.5	2	5	2	1	3	2	0	1
35	57.5	2	5	1	1	3	2	0	0
43	65.5	2	5	2	1	3	3	0	0
97	119.5	0	5	1	1	3	2	1	1
12	34.5	0	5	2	1	3	2	0	0
29	51.5	1	5	2	1	3	2	0	1
25	47.5	1	5	1	1	3	2	1	1
15	37.5	0	5	2	1	3	2	1	1
19	41.5	1	5	1	1	3	2	0	1
24	46.5	1	5	2	1	3	3	0	0
22	44.5	2	5	2	1	4	2	0	1
29	51.5	0	5	2	1	3	1	0	0
41	63.5	0	5	1	1	3	1	0	0
30	52.5	0	5	2	1	3	1	0	1
50	72.5	2	5	2	1	3	1	0	0
93	115.5	1	5	2	1	3	1	0	0
45	67.5	0	6	1	1	3	1	0	0
95	117.5	0	6	1	1	3	1	0	1
99	107	1	6	2	1	3	1	0	0
106	115	0	6	2	1	3	1	0	0
11	33.5	0	6	2	1	3	2	0	0
14	36.5	0	6	2	1	3	2	0	0
13	35.5	0	6	2	1	3	2	0	1
19	41.5	1	6	1	1	3	3	0	1
22	44.5	1	5	1	1	3	3	0	1
24	46.5	1	7	1	1	3	3	1	1
21	43.5	2	7	2	1	3	2	0	1
114	114	2	7	1	1	3	1	0	0
20	42.5	2	8	1	1	3	1	0	0
6	28.5	2	8	1	1	3	1	1	1
28	50.5	1	6	2	1	3	1	1	1
26	48.5	1	6	1	1	3	1	0	1
25	47.5	0	5	1	1	3	1	1	0
28	50.5	1	5	2	1	3	2	1	0
19	41.5	1	5	2	1	3	1	0	1
19	41.5	1	5	2	1	3	1	0	1
18	40.5	0	4	1	1	3	3	0	0
24	46.5	1	5	1	1	3	3	0	0
31	53.5	0	4	2	1	3	3	0	0
8	30.5	0	3	2	1	3	3	0	0
23	45.5	0	4	2	1	3	2	0	0
26	48.5	1	3	1	1	3	3	0	1
12	34.5	0	6	2	1	3	2	0	1
17	39.5	1	6	2	1	3	3	0	0
16	38.5	1	5	1	1	3	3	1	0
12	34.5	0	5	2	1	3	2	1	0
14	36.5	2	3	2	1	3	2	1	1
21	43.5	2	5	1	1	3	2	1	1
25	47.5	1	5	1	1	3	2	0	1
29	51.5	2	4	2	1	3	2	0	1
22	44.5	0	5	2	1	3	2	0	1
6	28.5	2	8	1	1	3	3	0	1
30	52.5	0	2	2	1	3	3	0	0
15	37.5	1	3	1	1	3	3	0	1
25	47.5	0	4	2	1	3	3	0	0
44	66.5	1	6	2	1	3	2	0	0
27	49.5	0	6	2	1	3	2	0	1
23	45.5	0	5	2	1	4	2	1	0
21	43.5	1	7	2	1	4	2	1	1
17	39.5	1	4	1	1	4	3	1	0
25	47.5	1	5	1	1	4	2	0	1
30	52.5	1	5	1	1	4	3	0	1
32	54.5	2	5	1	1	4	3	0	1
16	38.5	1	5	1	1	4	3	0	1
23	45.5	1	5	1	1	3	2	0	0
18	40.5	1	5	1	1	4	2	1	1
26	48.5	2	5	2	1	3	1	0	0
25	47.5	1	4	2	1	3	2	0	1
6	28.5	0	4	2	1	3	3	0	0
26	48.5	1	4	2	1	3	3	1	0
29	51.5	0	4	1	1	4	2	0	0
28	50.5	1	4	1	1	3	2	0	0
18	40.5	1	4	1	1	3	2	0	0
34	56.5	1	3	2	1	3	2	0	0
7	29.5	1	3	2	1	3	2	0	0
11	33.5	0	3	2	1	3	2	0	0
23	45.5	1	5	2	1	3	2	0	0
20	42.5	1	5	2	1	3	3	0	1
11	33.5	1	5	1	1	3	3	0	1
13	35.5	0	5	2	1	3	3	0	1
33	55.5	2	5	1	1	3	3	0	0
29	51.5	1	3	1	1	3	1	0	0
11	33.5	1	5	1	1	3	2	0	1
13	35.5	1	5	1	1	3	2	1	0
4	26.5	1	4	1	1	3	3	0	0
5	27.5	2	4	1	1	3	1	0	0
32	54.5	1	5	1	1	3	2	0	0
17	39.5	2	5	1	1	3	2	0	1
11	33.5	1	5	1	1	3	2	0	1
14	36.5	1	5	1	1	3	1	1	0
23	45.5	1	5	1	1	3	3	0	1
6	28.5	1	5	1	1	3	3	0	0
13	35.5	1	5	2	1	3	3	0	1
33	55.5	2	5	1	1	3	3	0	0
17	39.5	2	5	2	1	3	2	0	0
21	43.5	1	6	2	1	3	3	1	1
21	43.5	1	6	2	1	3	2	0	1
25	47.5	1	6	2	1	3	3	0	1
29	51.5	1	6	2	1	3	3	0	0
9	31.5	1	5	2	1	3	2	0	1
19	41.5	1	6	2	1	3	3	0	1
17	39.5	1	7	1	1	3	3	0	1
19	41.5	1	5	1	1	3	2	0	0
22	44.5	1	5	1	1	3	2	0	1
28	50.5	2	5	1	1	3	2	0	1
29	51.5	1	5	1	1	3	2	0	1
19	41.5	2	5	1	1	3	2	0	0
10	32.5	0	5	2	1	3	2	0	0
34	56.5	1	5	1	1	3	2	0	0
21	43.5	1	5	1	1	3	2	0	0
24	46.5	0	5	1	1	3	3	0	0
44	66.5	0	5	2	1	3	2	0	1
93	115.5	0	5	1	1	3	2	0	0
18	40.5	1	5	1	1	4	2	1	1
26	48.5	2	5	2	1	3	1	0	0
25	47.5	1	4	2	1	3	2	0	1
6	28.5	0	4	2	1	3	3	0	0
26	48.5	1	4	2	1	3	3	1	0
25	47.5	0	4	1	1	4	3	0	0
29	51.5	0	4	1	1	4	2	0	0
18	40.5	1	4	1	1	3	2	0	0
26	48.5	1	3	1	1	3	2	0	1
34	56.5	1	3	2	1	3	2	0	0
7	29.5	1	3	2	1	3	2	0	0
11	33.5	1	3	2	1	3	2	0	0
23	45.5	1	5	2	1	3	2	0	0
20	42.5	1	5	2	1	3	3	0	1
11	33.5	1	5	1	1	3	3	0	1
13	35.5	0	5	2	1	3	3	0	1
29	51.5	0	6	1	1	3	1	0	0
7	29.5	1	7	1	1	3	1	1	0
11	33.5	1	7	1	1	3	2	0	1
13	35.5	1	5	1	1	3	2	1	0
4	26.5	1	5	1	1	3	2	0	0
32	54.5	1	5	1	1	3	2	0	0
27	49.5	0	5	1	1	3	2	0	1
17	39.5	0	5	1	1	3	2	0	0
16	38.5	1	5	1	1	3	2	0	0
28	50.5	0	5	1	1	3	1	0	1
19	41.5	0	5	1	1	3	1	0	0
26	48.5	1	5	1	1	3	1	0	0
6	28.5	0	5	1	1	3	2	0	0
26	48.5	0	5	1	1	3	2	1	1
25	47.5	0	5	1	1	3	2	0	1
28	50.5	1	4	1	1	3	1	0	0
19	41.5	0	4	1	1	3	1	0	0
26	48.5	0	4	1	1	3	1	1	1
35	57.5	0	4	1	1	3	1	1	1
7	29.5	1	4	1	1	3	1	1	0
19	19	1	5	1	2	3	2	0	0
36	56	1	5	1	2	3	2	0	1
16	36	2	5	1	2	3	2	0	1
19	39	1	5	1	2	3	2	0	1
12	32	2	5	1	2	3	2	0	0
12	32	0	5	2	2	3	2	0	0
24	44	0	5	1	2	3	2	0	0
14	34	0	5	1	2	3	2	0	0
17	37	0	5	1	2	3	3	0	0
29	49	0	5	2	2	3	2	0	1
93	93	1	5	1	2	3	2	0	0
106	106	0	4	2	2	3	2	0	0
118	118	0	5	2	2	3	2	0	0
102	102	2	4	1	2	3	1	0	0
9	29	1	4	2	2	3	2	0	0
5	25	1	5	1	2	3	3	0	0
21	41	1	5	1	2	3	3	0	0
25	45	1	5	2	2	3	2	0	0
29	49	2	5	1	2	3	2	0	0
94	114	2	5	1	2	3	1	0	0
109	129	2	5	1	2	3	2	0	0
21	41	1	5	1	2	3	3	0	1
24	44	1	5	2	2	3	3	0	1
28	48	0	5	2	2	3	3	0	1
5	3	1	5	2	2	3	2	0	1
3	23	1	5	1	2	3	3	0	1
6	10	1	5	1	2	3	3	1	1
8	28	1	5	1	2	3	3	1	1
10	13	1	6	1	2	3	3	1	1
10	30	1	6	2	2	3	3	1	1
12	32	1	6	2	2	3	3	1	1
15	35	1	6	2	2	3	2	1	1
17	17	0	7	2	2	3	3	0	1
24	44	0	7	1	2	3	2	0	0
6	26	1	7	1	2	3	3	1	0
11	31	1	7	2	2	3	3	1	0
6	26	1	7	2	2	3	3	1	0
119	119	0	7	1	2	3	2	0	0
78	95	1	7	2	2	3	2	0	0
114	134	0	8	1	2	3	2	0	0
20	40	1	8	2	2	3	2	0	1
29	49	1	5	1	2	3	2	0	0
24	44	0	5	1	2	2	1	1	1
29	49	0	5	1	2	3	1	0	1
14	34	1	5	1	2	3	1	0	0
70	90	1	5	1	2	3	1	0	0
13	33	1	5	1	2	3	1	0	0
28	48	1	4	1	2	3	1	0	0
26	46	1	4	1	2	3	1	1	0
25	45	1	5	1	2	3	2	0	0
29	49	0	5	1	2	3	2	0	0
33	53	0	5	1	2	3	1	0	1
18	38	1	4	1	2	3	2	1	0
24	44	1	5	1	2	3	2	1	0
21	41	1	4	1	2	3	2	0	0
10	30	0	4	1	2	3	2	0	0
37	57	1	5	2	2	3	1	0	0
12	32	2	5	2	2	3	1	0	0
8	28	0	5	1	2	3	1	0	1
31	51	0	5	1	2	3	2	0	0
13	30	1	3	1	3	3	3	0	1
14	31	1	4	2	3	3	3	0	0
19	36	0	5	2	3	3	2	0	0
22	39	0	6	2	3	3	2	0	1
21	38	0	5	2	3	4	2	1	0
21	38	0	7	2	3	4	2	1	1
15	32	0	4	1	3	4	3	1	0
29	46	1	5	1	3	4	3	0	1
18	35	2	5	1	3	4	3	0	1
12	29	1	5	1	3	4	3	0	1
4	21	1	5	1	3	3	2	0	0
12	29	1	5	1	3	4	2	1	1
20	37	2	5	2	3	3	1	0	0
10	27	1	4	2	3	3	2	0	1
17	34	0	4	2	3	3	3	0	0
9	26	1	4	2	3	3	3	1	0
22	39	0	4	1	3	4	2	0	0
22	39	1	4	1	3	3	2	0	0
9	26	1	3	1	3	3	2	0	1
17	34	1	3	2	3	3	2	0	0
3	20	1	3	2	3	3	2	0	0
6	23	1	3	2	3	3	2	0	0
30	47	1	5	2	3	3	2	0	0
11	28	1	5	2	3	3	3	0	1
6	23	1	5	1	3	3	3	0	1
13	30	1	5	2	3	3	3	0	1
17	34	2	5	1	3	3	3	0	0
15	32	2	5	2	3	3	2	0	0
30	47	1	6	2	3	3	3	1	1
17	34	1	6	2	3	3	2	0	1
20	37	1	6	2	3	3	3	0	1
17	34	0	6	2	3	3	3	0	0
21	38	1	5	2	3	3	2	0	1
30	47	1	6	2	3	3	3	0	1
15	32	1	6	1	3	4	3	0	1
19	36	1	5	1	3	3	2	0	0
13	30	1	5	1	3	3	2	0	1
13	30	2	5	1	3	3	2	0	1
14	31	1	5	1	3	3	2	0	1
3	20	2	5	1	3	3	2	0	0
21	38	0	5	2	3	3	2	0	0
17	34	0	5	1	3	3	2	0	0
4	21	1	5	1	3	3	2	0	0
19	36	0	5	2	3	3	2	0	1
93	110	0	5	1	3	3	2	0	0
106	106	0	4	2	3	3	2	0	0
21	38	0	5	2	3	3	2	0	0
24	41	0	4	1	3	3	1	0	0
7	24	0	4	2	3	3	3	0	0
4	21	1	5	1	3	3	3	0	0
11	28	1	5	1	3	3	3	0	0
19	36	0	5	2	3	3	2	0	0
19	36	2	5	1	3	3	2	0	0
94	94	2	5	1	3	3	1	0	0
95	95	2	5	1	3	3	2	0	0
18	35	1	5	1	3	3	3	0	1
20	37	1	5	2	3	3	3	0	1
21	38	1	5	2	3	3	3	0	1
4	21	1	5	2	3	3	2	0	1
3	20	1	5	1	3	3	3	0	1
6	23	1	5	1	3	3	3	1	1
8	25	1	5	1	3	3	3	1	1
8	25	1	6	1	3	3	3	1	1
11	28	1	6	1	3	3	3	1	0
8	25	1	6	2	3	3	3	1	1
12	29	1	6	2	3	3	3	1	1
15	32	0	6	2	3	3	2	1	1
17	34	0	7	2	3	3	3	0	1
19	36	0	7	1	3	3	2	0	0
8	25	1	7	2	3	3	3	1	0
7	24	1	7	2	3	3	3	1	0
80	104	1	7	1	3	3	2	0	0
106	106	0	7	2	3	3	2	0	0
100	100	0	8	1	3	3	2	0	0
15	32	1	8	2	3	3	2	0	1
22	39	1	5	1	3	3	2	0	0
13	30	2	4	2	3	4	3	0	1
103	120	2	3	1	3	3	2	0	1
105	122	0	3	2	3	3	2	1	0
71	88	1	5	2	3	3	1	0	0
22	39	0	5	1	3	3	2	0	0
25	42	0	5	1	3	3	3	0	0
21	38	2	5	2	3	3	2	0	1
2	19	2	5	1	3	3	2	0	0
21	38	2	5	2	3	3	3	0	0
25	42	0	5	1	3	3	2	1	1
3	20	2	5	2	3	3	2	0	0
21	38	1	5	2	3	3	2	0	1
25	42	1	5	1	3	3	2	1	1
15	32	1	5	2	3	3	2	1	1
10	27	1	5	1	3	3	2	0	1
8	25	2	5	2	3	3	3	0	0
22	39	2	5	2	3	4	2	0	1
10	27	0	5	2	3	3	1	0	0
13	30	0	5	1	3	3	1	0	0
17	34	0	5	2	3	3	1	0	1
17	34	2	5	2	3	3	1	0	0
93	110	0	5	2	3	3	1	0	0
20	37	0	6	1	3	3	1	0	0
69	86	1	6	1	3	3	1	0	0
50	67	0	6	2	3	3	1	0	0
92	109	0	6	2	3	3	1	0	0
11	28	1	6	2	3	3	2	0	0
12	29	1	6	2	3	3	2	0	0
13	30	1	6	2	3	3	2	0	1
18	35	1	6	1	3	3	3	0	1
19	36	1	5	1	3	3	3	0	1
20	37	1	7	1	3	3	3	1	1
9	26	2	7	2	3	3	2	0	1
22	39	2	7	1	3	3	1	0	0
6	23	2	8	1	3	3	1	0	0
20	37	2	8	1	3	3	1	1	1
17	34	1	6	2	3	3	1	1	1
30	49.5	0	6	2	4	3	3	0	0
10	29.5	1	5	2	4	3	2	1	0
13	32.5	2	3	2	4	3	2	1	1
13	32.5	2	5	1	4	3	2	1	1
20	39.5	1	4	1	4	3	2	0	1
21	40.5	2	4	2	4	3	2	0	1
13	32.5	0	5	2	4	3	2	0	1
16	35.5	1	6	1	4	3	3	0	1
4	23.5	2	8	1	4	3	3	0	1
21	40.5	0	2	2	4	3	3	0	0
14	33.5	1	3	1	4	3	3	0	1
18	37.5	1	4	2	4	3	3	0	0
24	43.5	1	5	2	4	3	2	0	0
25	44.5	0	6	2	4	3	2	0	1
20	39.5	0	5	2	4	4	2	1	0
55	74.5	1	7	2	4	4	2	1	1
23	42.5	1	5	1	4	4	2	0	1
28	47.5	1	5	1	4	4	3	0	1
23	42.5	2	5	1	4	4	3	0	1
18	37.5	1	5	1	4	3	2	0	0
17	36.5	1	5	1	4	4	2	1	1
24	43.5	2	5	2	4	3	1	0	0
16	35.5	1	4	2	4	3	2	0	1
4	23.5	0	4	2	4	3	3	0	0
20	39.5	1	4	2	4	3	3	1	0
23	42.5	1	4	1	4	4	3	0	0
27	46.5	0	4	1	4	4	2	0	0
26	45.5	1	4	1	4	3	2	0	0
17	36.5	1	3	1	4	3	2	0	1
29	48.5	1	3	2	4	3	2	0	0
5	24.5	1	3	2	4	3	2	0	0
10	29.5	2	3	2	4	3	2	0	0
15	34.5	1	5	2	4	3	2	0	0
20	39.5	1	5	2	4	3	3	0	1
11	30.5	1	5	1	4	3	3	0	1
13	32.5	1	5	2	4	3	3	0	1
24	43.5	2	5	1	4	3	3	0	0
10	29.5	2	5	2	4	3	2	0	0
11	30.5	1	6	2	4	3	3	1	1
19	38.5	1	6	2	4	3	2	0	1
23	42.5	1	6	2	4	3	3	0	1
23	42.5	1	6	2	4	3	3	0	0
6	25.5	1	5	2	4	3	2	0	1
11	30.5	1	6	2	4	3	3	0	1
18	37.5	1	6	1	4	4	3	0	1
16	35.5	1	7	1	4	3	3	0	1
16	35.5	1	5	1	4	3	2	0	1
17	36.5	2	5	1	4	3	2	0	1
18	37.5	2	5	1	4	3	2	0	1
21	40.5	1	5	1	4	3	2	0	1
12	31.5	2	5	1	4	3	2	0	0
7	26.5	0	5	2	4	3	2	0	0
25	44.5	0	5	1	4	3	2	0	0
10	29.5	0	5	1	4	3	3	0	0
15	34.5	0	5	1	4	3	3	0	0
34	53.5	0	5	2	4	3	2	0	1
93	112.5	0	5	1	4	3	2	0	0
101	120.5	0	4	2	4	3	2	0	0
111	111	0	5	2	4	3	2	0	0
100	119.5	0	4	1	4	3	1	0	0
10	29.5	1	4	2	4	3	2	0	0
5	24.5	1	5	1	4	3	3	0	0
21	40.5	1	5	1	4	3	3	0	0
25	44.5	1	5	2	4	3	2	0	0
34	53.5	2	5	1	4	3	2	0	0
94	113.5	2	5	1	4	3	1	0	0
101	101	2	5	1	4	3	2	0	0
21	40.5	1	5	1	4	3	3	0	1
24	43.5	1	5	2	4	3	3	0	1
26	45.5	1	5	2	4	3	3	0	1
5	24.5	1	5	2	4	3	2	0	1
3	22.5	1	5	1	4	3	3	0	1
6	25.5	1	5	1	4	3	3	1	1
8	27.5	1	5	1	4	3	3	1	1
10	29.5	1	6	1	4	3	3	1	1
13	32.5	1	6	1	4	3	3	1	0
10	29.5	1	6	2	4	3	3	1	1
12	31.5	1	6	2	4	3	3	1	1
15	34.5	1	6	2	4	3	2	1	1
17	36.5	0	7	2	4	3	3	0	1
22	41.5	0	7	1	4	3	2	0	0
6	25.5	1	7	1	4	3	3	1	0
11	30.5	0	7	2	4	3	3	1	0
9	28.5	1	7	2	4	3	3	1	0
110	110	0	7	1	4	3	2	0	0
105	105	0	7	2	4	3	2	0	0
107	107	0	8	1	4	3	2	0	0
20	39.5	1	8	2	4	3	2	0	1
34	53.5	1	5	1	4	3	2	0	0
17	36.5	2	4	2	4	4	3	0	1
107	126.5	2	3	1	4	3	2	0	1
99	118.5	0	3	2	4	3	2	1	0
100	119.5	0	5	2	4	3	1	0	0
97	116.5	0	5	1	4	3	2	0	0
97	116.5	0	5	1	4	3	3	0	0
23	42.5	2	5	2	4	3	2	0	1
28	47.5	1	5	1	4	3	2	0	0
25	44.5	2	5	2	4	3	3	0	0
92	111.5	0	5	1	4	3	2	1	1
9	28.5	2	5	2	4	3	2	0	0
29	48.5	1	5	2	4	3	2	0	1
13	32.5	0	5	1	4	3	1	1	1
15	34.5	1	5	2	4	3	2	1	1
22	41.5	1	5	1	4	3	2	0	1
18	37.5	2	5	2	4	3	3	0	0
22	41.5	2	5	2	4	4	2	0	1
20	39.5	0	5	2	4	3	1	0	0
25	44.5	0	5	1	4	3	1	0	0
24	43.5	0	5	2	4	3	1	0	1
40	59.5	2	5	2	4	3	1	0	0
93	112.5	0	5	2	4	3	1	0	0
35	54.5	1	6	1	4	3	1	0	0
95	114.5	0	6	1	4	3	1	0	0
99	118.5	0	5	2	4	3	1	0	0
106	106	0	6	2	4	3	1	0	0
11	30.5	1	6	2	4	3	2	0	0
14	33.5	1	6	2	4	3	2	0	0
13	32.5	1	6	2	4	3	2	0	1
19	38.5	1	6	1	4	3	3	0	1
22	41.5	1	5	1	4	3	3	0	1
24	43.5	1	7	1	4	3	3	1	1
14	33.5	2	7	2	4	3	2	0	1
111	111	2	7	1	4	3	1	0	0
13	32.5	1	8	1	4	3	1	0	0
6	25.5	1	8	1	4	3	1	1	1
28	47.5	1	5	2	4	3	1	1	1
23	42.5	1	6	1	4	2	1	0	1
25	44.5	1	4	1	4	2	1	1	0
28	47.5	1	4	2	4	3	2	1	0
29	48.5	1	5	1	4	2	2	1	1
13	32.5	1	5	2	4	2	1	0	1
18	37.5	0	4	1	4	3	3	0	0
25	44.5	0	4	2	4	3	3	0	0
8	27.5	0	3	2	4	3	3	0	0
17	36.5	0	4	2	4	3	2	0	0
26	45.5	1	3	1	4	3	3	0	1
12	31.5	1	4	2	4	3	2	0	1
8	27.5	1	7	1	4	3	2	0	0
30	49.5	0	6	2	4	3	3	0	0
13	32.5	1	5	1	4	3	3	1	0
11	30	1	5	2	5	3	2	1	0
10	29	1	5	2	5	3	3	1	1
12	32	1	5	2	5	3	3	1	1
15	34	1	4	2	5	3	2	1	1
17	36	1	7	2	5	3	3	0	1
4	23	1	4	1	5	3	3	1	0
9	28	1	7	2	5	3	3	1	0
9	28	1	6	2	5	3	3	1	0
98	117	0	6	1	5	3	2	0	0
93	112	0	7	2	5	3	2	0	0
95	114	0	8	1	5	3	2	0	0
18	37	1	8	2	5	3	2	0	1
19	38	1	5	1	5	3	2	0	0
14	33	2	4	2	5	4	3	0	1
101	120	2	3	1	5	3	2	0	1
99	118	0	3	2	5	3	2	1	0
100	68	1	5	2	5	3	1	0	0
96	115	0	5	1	5	3	2	0	0
97	116	0	5	1	5	3	3	0	0
17	36	2	5	2	5	3	2	0	1
23	42	2	5	2	5	3	3	0	0
22	41	0	5	1	5	3	2	1	1
21	40	2	5	2	5	3	2	0	0
29	48	1	4	2	5	3	2	0	1
21	40	1	4	1	5	3	2	1	1
11	30	1	4	1	5	3	1	1	1
15	34	1	4	2	5	3	2	1	1
8	27	2	5	2	5	3	3	0	0
22	41	2	5	2	5	4	2	0	1
98	117	0	4	2	5	3	1	0	0
16	35	2	4	1	5	3	1	0	0
18	37	1	5	2	5	3	1	0	1
19	38	2	5	2	5	3	1	0	0
22	41	1	5	2	5	3	1	0	0
5	24	1	6	1	5	3	1	0	0
6	25	0	6	1	5	3	1	0	0
21	40	1	5	2	5	3	1	0	0
8	27	0	6	2	5	3	1	0	0
11	30	1	5	2	5	3	2	0	0
10	29	1	6	2	5	3	2	0	0
13	32	1	5	2	5	3	2	0	1
19	38	1	6	1	5	3	3	0	1
24	43	1	7	1	5	3	3	1	1
28	47	1	7	1	5	3	3	1	1
6	25	2	7	2	5	3	2	0	1
23	42	2	7	1	5	3	1	0	0
2	21	2	8	1	5	3	1	1	1
23	42	1	6	2	5	3	1	1	1
22	41	1	5	1	5	3	1	1	0
28	47	1	5	2	5	3	2	1	0
26	45	1	5	1	5	3	2	1	1
30	49	1	5	2	5	3	1	0	1
24	43	1	4	1	5	3	3	0	0
17	36	0	4	2	5	3	3	0	0
22	41	0	2	2	5	3	3	0	0
12	31	0	3	2	5	3	2	0	0
11	30	1	4	2	5	3	2	0	1
6	25	1	6	1	5	3	2	0	0
26	45	0	6	2	5	3	3	0	0
13	32	1	5	1	5	3	3	1	0
11	30	1	4	2	5	3	2	1	0
32	43	1	5	2	5	3	2	1	1
